# Supplementary material
Source: PubMed Central journal article supplement (PMC3542989)
Supplement: supp_M112.426957_jbc.M112.426957-1.pdf [file supp_M112.426957_jbc.M112.426957-1.pdf]

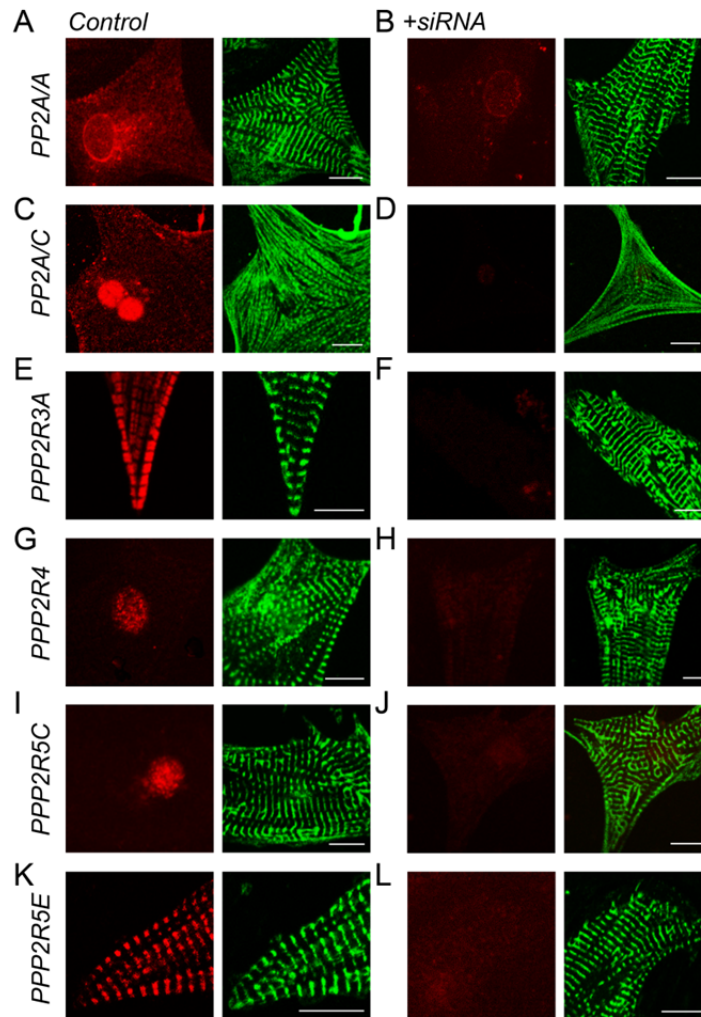

**SUPPLEMENTAL FIGURE 1.** *Validation of PP2A isoform-specific antibodies.* Immunostaining of wild-type neonatal cardiomyocytes  $\pm$  expression of specific PP2A isoform siRNAs. Images were representative of hundreds of myocytes in the culture and alpha-actinin or phalloidin was utilized to validate cells as myocytes for imaging. Scale bar equals 10 microns. *A-B)* *PPP2A/A* and  $\alpha$ -actinin  $\pm$  siRNA. *C-D)* *PP2A/C* and phalloidin  $\pm$  siRNA. *E-F)* *PPP2R3A* and  $\alpha$ -actinin  $\pm$  siRNA. *G-H)* *PPP2R4* and  $\alpha$ -actinin  $\pm$  siRNA. *I-J)* *PPP2R5C* and  $\alpha$ -actinin  $\pm$  siRNA. *K-L)* *PPP2R5E* and  $\alpha$ -actinin  $\pm$  siRNA. Note that while perinuclear and nuclear staining is shown for *PP2A/A* and *PP2A/C*, analysis across multiple cells revealed distribution of these isoforms across myocyte membrane domains (i.e. nuclear, perinuclear, striated).

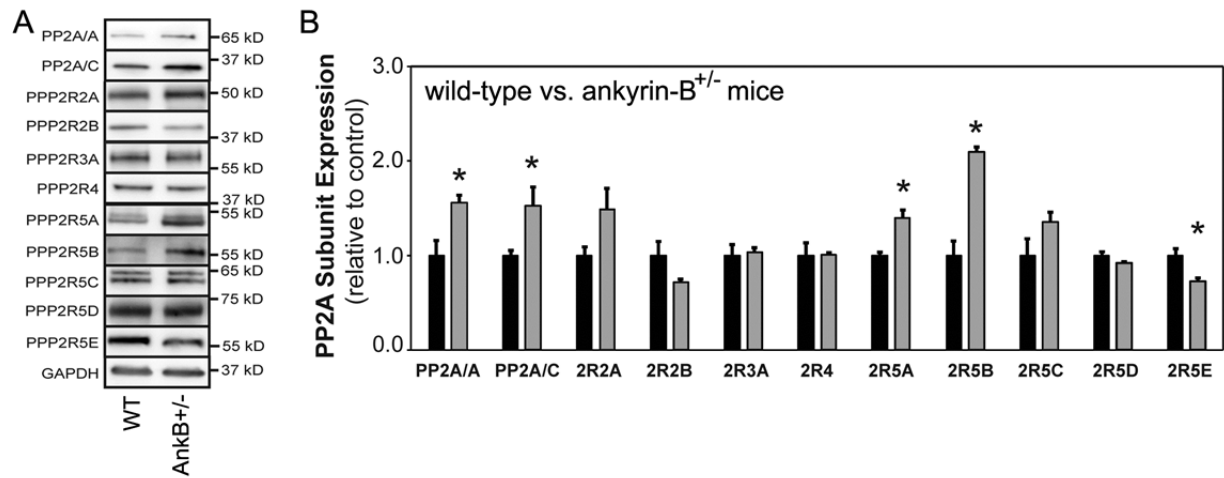

**SUPPLEMENTAL FIGURE 2.** *Differential PP2A subunit regulation in a murine model of human catecholaminergic polymorphic ventricular tachycardia.* A-B) PP2A subunit expression levels in WT and ankyrin-B<sup>+/-</sup> mice. GAPDH was utilized as a loading control (N=5 samples/genotype, p<0.05).

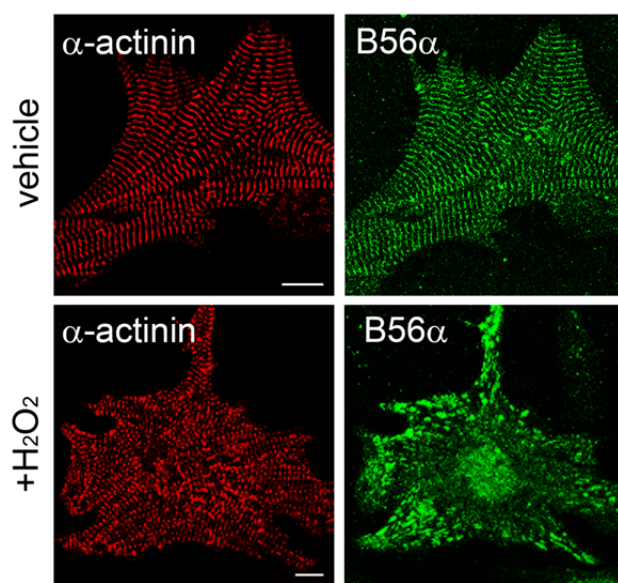

**SUPPLEMENTAL FIGURE 3.** *Differential distribution of PP2A regulatory subunit B56α (PPP2R5A) following H<sub>2</sub>O<sub>2</sub> treatment.* Control mouse cardiomyocytes and myocytes treated with H<sub>2</sub>O<sub>2</sub> (75 μM for 60 minutes). Myocytes were confirmed by alpha-actinin co-labeling. Scale bar equals ten microns.
